# Supplementary material
Source: PubMed Central journal article supplement (PMC8971163)
Supplement: 268_2022_6503_MOESM1_ESM.pdf [file 268_2022_6503_MOESM1_ESM.pdf]

## Electronic Supplementary Material

**Title:** Impact of the COVID-19 Pandemic on Pediatric Surgical Volume in four Low- and Middle-Income Country Hospitals: Insights from an Interrupted Time Series Analysis

**Journal:** World Journal of Surgery

### Authors:

Paul Park, MS<sup>1,2</sup>, Ruth Laverde, BS<sup>1,2</sup>, Greg Klazura, MD<sup>2,3</sup>, Ava Yap, MD, MHS<sup>2,4</sup>, Bruce Bvulani, MBChB<sup>5</sup>, Bertille Ki, MD<sup>6</sup>, Toussaint W Tapsoba, MD<sup>6</sup>, Emmanuel A Ameh, MBBS<sup>7</sup>, Maryrose Osazuwa, MBBS<sup>8</sup>, Michele Ugazzi, MD<sup>9</sup>, José Daza, MD<sup>9</sup>, Emma Bryce, MPH<sup>10</sup>, David Cunningham<sup>10</sup>, Doruk Ozgediz, MD, MSc<sup>2,4</sup>

<sup>1</sup> *University of California, San Francisco, School of Medicine, San Francisco, CA, USA*

<sup>2</sup> *University of California, San Francisco, Center for Health Equity in Surgery and Anesthesia, San Francisco, CA, USA*

<sup>3</sup> *Loyola University Health System, Department of Surgery, Maywood, IL, USA*

<sup>4</sup> *University of California, San Francisco, Department of Surgery, San Francisco, CA, USA*

<sup>5</sup> *University Teaching Hospital of Lusaka, Department of Paediatric Surgery, Lusaka, Zambia*

<sup>6</sup> *Centre Hospitalier Universitaire Pédiatrique Charles De Gaulle, Department of Paediatric Surgery, Ouagadougou, Burkina Faso*

<sup>7</sup> *National Hospital, Abuja, Division of Paediatric Surgery, Abuja, Nigeria*

<sup>8</sup> *National Hospital, Abuja, Department of Anesthesia, Abuja, Nigeria*

<sup>9</sup> *Hospital de los Valles, Division of Pediatric Surgery, Quito, Ecuador*

<sup>10</sup> *Kids Operating Room, Edinburgh, Scotland, United Kingdom*

*Correspondence to: Paul Park*

University of California, San Francisco, School of Medicine  
513 Parnassus Ave, Suite S-224, San Francisco, CA 94143, USA  
[paul.park@ucsf.edu](mailto:paul.park@ucsf.edu); +1 (858) 880-5151

**Supplemental Table 1** Variables in the Data Collection Protocol

| Variable                 | Category     | Variable Label                                                                              |
|--------------------------|--------------|---------------------------------------------------------------------------------------------|
| record_id                | demographics | Record ID                                                                                   |
| site_country             | demographics | Country                                                                                     |
| study_id                 | demographics | Study ID                                                                                    |
| dob                      | demographics | Date of birth (if known)                                                                    |
| age_number               | demographics | Age                                                                                         |
| age_units                | demographics | Age Unit                                                                                    |
| sex                      | demographics | Sex                                                                                         |
| weight                   | demographics | Weight (kilograms)                                                                          |
| admit_date               | demographics | Date of admission                                                                           |
| surgery_date             | demographics | Date of surgery                                                                             |
| transfer                 | demographics | Was the patient transferred from another health center?                                     |
| existing_patient         | demographics | Is this a new entry for an existing patient who has previously had an operation in this OR? |
| staged                   | demographics | Is this operation part of a planned or staged procedure?                                    |
| time                     | demographics | Time of operation                                                                           |
| prematurity              | demographics | Was the patient born prematurely (born before 37 weeks of gestation)?                       |
| elective                 | surgeon      | Was this an elective (planned) operation?                                                   |
| diagnosis_1              | surgeon      | Diagnosis - 1                                                                               |
| diagnosis_2              | surgeon      | Diagnosis - 2                                                                               |
| diagnosis_3              | surgeon      | Diagnosis - 3                                                                               |
| diagnosis_4              | surgeon      | Diagnosis - 4                                                                               |
| other_anorectal          | surgeon      | Specify Other Anorectal Disease                                                             |
| other_intestinal_atresia | surgeon      | Specify Other Intestinal Atresia                                                            |
| other_esophageal_atresia | surgeon      | Specify Other Esophageal Atresia                                                            |
| hypospadias_subtype      | surgeon      | Specify Hypospadias Subtype                                                                 |
| other_urogenital         | surgeon      | Specify Urogenital Malformation                                                             |
| other_heart              | surgeon      | Specify Congenital Heart Disease                                                            |
| other_msk                | surgeon      | Specify Musculoskeletal Malformation                                                        |
| other_mmc                | surgeon      | Specify Spina Bifida Type                                                                   |
| other_teratoma           | surgeon      | Specify Teratoma Site                                                                       |
| other_abd_mass           | surgeon      | Specify Abdominal Mass or Tumor                                                             |
| other_ovarian            | surgeon      | Specify Ovarian Mass or Tumor                                                               |
| other_testicular         | surgeon      | Specify Testicular or Scrotal Mass or Tumor                                                 |
| other_soft_tissue        | surgeon      | Specify Soft Tissue Mass or Tumor                                                           |
| other_extremity          | surgeon      | Specify Extremity Mass or Tumor                                                             |
| other_lymphoma           | surgeon      | Specify Myeloproliferative Disorder                                                         |
| other_trauma             | surgeon      | Specify Trauma                                                                              |
| other_burn               | surgeon      | Specify Burn Site                                                                           |
| other_abscess_type       | surgeon      | Specify Skin & Soft Tissue Infection Type                                                   |
| other_abscess_location   | surgeon      | Specify Skin & Soft Tissue Infection Location                                               |
| other_necfasc_type       | surgeon      | Specify Necrotizing Soft Tissue Infection Type                                              |
| other_necfasc_location   | surgeon      | Specify Necrotizing Soft Tissue Infection Location                                          |
| other_intestinal_perf    | surgeon      | Specify Other Intestinal Perforation                                                        |
| other_neonatal_sepsis    | surgeon      | Specify Neonatal Sepsis                                                                     |
| post_op_complications    | surgeon      | Specify Post Operative Complication                                                         |
| other_post_op            | surgeon      | Specify Other Post Operative Complication                                                   |

|                                |         |                                                             |
|--------------------------------|---------|-------------------------------------------------------------|
| other unspecified              | surgeon | Specify Other                                               |
| other foreign body             | surgeon | Specify Other Foreign Body Location                         |
| other cns                      | surgeon | Specify CNS Mass or Tumor                                   |
| other thoracic                 | surgeon | Specify Thoracic Mass or Tumor                              |
| other airway                   | surgeon | Specify Airway Disorder                                     |
| other infectious               | surgeon | Specify Infectious Disease                                  |
| other infectious specify       | surgeon | Specify Other Infectious Disease                            |
| other ldn                      | surgeon | Specify Lymphadenopathy                                     |
| procedure 1                    | surgeon | Procedure - 1                                               |
| procedure 2                    | surgeon | Procedure - 2                                               |
| procedure 3                    | surgeon | Procedure - 3                                               |
| procedure 4                    | surgeon | Procedure - 4                                               |
| procedure 5                    | surgeon | Procedure - 5                                               |
| specify_small_bowel_re<br>sect | surgeon | Specify Small Bowel Segment                                 |
| other small bowel seg          | surgeon | Specify Other Small Bowel Segment                           |
| pull through type              | surgeon | Specify Pull-Through Type                                   |
| specify anoplasty              | surgeon | Specify Other Anoplasty (ex: cloacal exstrophy repair)      |
| specify gastroschisis          | surgeon | Specify Gastroschisis Repair Type                           |
| specify omphalocele            | surgeon | Specify Omphalocele Repair Type                             |
| specify choledochal            | surgeon | Specify Choledochal Cyst Excision Type                      |
| specify hernia                 | surgeon | Specify Herniorrhaphy Site                                  |
| specify hypospadias            | surgeon | Specify Hypospadias Reconstruction Technique                |
| specify urogenital             | surgeon | Specify Complex Urogenital Repair Procedure                 |
| specify abdominal              | surgeon | Specify Abdominal Mass Site                                 |
| specify skin graft             | surgeon | Specify Skin Graft Site                                     |
| specify osteo                  | surgeon | Specify Osteomyelitis Site                                  |
| specify thoracic               | surgeon | Specify Thoracic Procedure                                  |
| specify gastric                | surgeon | Specify Gastric Procedure                                   |
| specify hepatic                | surgeon | Specify Hepatic Procedure                                   |
| specify pancreatic             | surgeon | Specify Pancreatic Procedure                                |
| specify splenic                | surgeon | Specify Splenic Procedure                                   |
| specify kidney                 | surgeon | Specify Kidney Procedure                                    |
| specify adrenal                | surgeon | Specify Other Adrenal Procedure                             |
| specify vascular               | surgeon | Specify Vascular Procedure                                  |
| specify heart                  | surgeon | Specify Congenital Heart Repair                             |
| specify msk                    | surgeon | Specify Musculoskeletal Procedure                           |
| specify cns                    | surgeon | Specify Central Nervous System Procedure                    |
| specify other                  | surgeon | Specify Other Procedure                                     |
| primary surgeon                | surgeon | Primary surgeon type                                        |
| assistant surgeons             | surgeon | Assistant Surgeons (select all that apply)                  |
| surgical trainee present       | surgeon | Was a surgical trainee present?                             |
| essential equipment_s          | surgeon | Were necessary surgical equipment missing?                  |
| missing list_s                 | surgeon | Which resources were not available? (select all that apply) |
| other equipment_s              | surgeon | Specify other equipment not available                       |
| other resources_s              | surgeon | Specify other resources not available                       |
| laparoscopy available          | surgeon | Was laparoscopy available for this operation?               |
| laparoscopy used               | surgeon | Was laparoscopy used for this operation?                    |

|                           |                |                                                                                                                                             |
|---------------------------|----------------|---------------------------------------------------------------------------------------------------------------------------------------------|
| lap would have used       | surgeon        | Would you have considered using laparoscopy if it was available?                                                                            |
| laparoscopy issues        | surgeon        | Were there any problems using laparoscopy during this case?                                                                                 |
| lap issues description    | surgeon        | Describe the problems with laparoscopy that were encountered:                                                                               |
| lap why not               | surgeon        | Why wasn't laparoscopy used during this operation?                                                                                          |
| lap why not desc          | surgeon        | List other reason laparoscopy wasn't used:                                                                                                  |
| anaesthesia provider      | anaesthetist   | Anaesthesia provider (select all that apply)                                                                                                |
| anaesthesia type          | anaesthetist   | Anaesthesia type (select all that apply)                                                                                                    |
| anaesthesia gen specify   | anaesthetist   | Specify the type of general anesthesia used? (Select all that apply)                                                                        |
| anaesthesia trainee       | anaesthetist   | Was an anaesthesia trainee present?                                                                                                         |
| essential equipment a     | anaesthetist   | Were necessary anaesthesia equipment and / or drugs missing?                                                                                |
| missing list a            | anaesthetist   | Which resources were not available? (select all that apply)                                                                                 |
| other resources a         | anaesthetist   | Specify other resources not available                                                                                                       |
| asa                       | anaesthetist   | ASA Class                                                                                                                                   |
| preop temp                | anaesthetist   | Pre-Operative Temperature (degrees Celsius)                                                                                                 |
| sepsis                    | anaesthetist   | Sepsis in 48 hours prior to surgery?                                                                                                        |
| sepsis specify            | anaesthetist   | How was sepsis diagnosed? (select all that apply)                                                                                           |
| sirs criteria 1           | anaesthetist   | SIRS criteria by age group                                                                                                                  |
| blood transfusion         | anaesthetist   | Did the patient receive a blood transfusion?                                                                                                |
| blood_transfusion_specify | anaesthetist   | Specify when the patient received blood transfusion. (select all that apply)                                                                |
| oxygen                    | anaesthetist   | Did the patient receive supplemental oxygen?                                                                                                |
| oxygen specify            | anaesthetist   | Specify when the patient received oxygen. (select all that apply)                                                                           |
| pre op abx                | anaesthetist   | Did the patient receive antibiotics?                                                                                                        |
| pre op abx specify        | anaesthetist   | Specify when the patient received antibiotics. (select all that apply)                                                                      |
| safety checklist          | anaesthetist   | Safety Checklist Used in OR?                                                                                                                |
| postop temp               | anaesthetist   | Post-Operative Temperature (degrees Celsius)                                                                                                |
| discharge date            | discharge      | Date of discharge                                                                                                                           |
| icu                       | discharge      | Did the patient require ICU care post-operatively?                                                                                          |
| icu no                    | discharge      | Did the patient require higher level of care, but ICU was not available?                                                                    |
| icu duration              | discharge      | How many days was the patient admitted to the ICU?                                                                                          |
| post op abx               | discharge      | Antibiotics given post-operatively?                                                                                                         |
| post op sepsis            | discharge      | Post-operative sepsis?                                                                                                                      |
| post op sepsis specify    | discharge      | How was sepsis diagnosed? (select all that apply)                                                                                           |
| sirs criteria 2           | discharge      | SIRS criteria by age group                                                                                                                  |
| wound infection           | discharge      | Post operative surgical site infection?                                                                                                     |
| re operation              | discharge      | Did the patient need another operation this admission?                                                                                      |
| discharge status          | discharge      | Status at discharge                                                                                                                         |
| death on table            | discharge      | Was this an on-table death?                                                                                                                 |
| wait time                 | socioeconomics | How long did the child wait to have the operation?                                                                                          |
| hospital cost             | socioeconomics | Out of pocket DIRECT medical cost of hospitalization (hospital stay, procedures, medical and diagnostic tests, medications, supplies, etc.) |
| travel cost               | socioeconomics | Out of pocket INDIRECT medical cost of hospitalization (transportation, feeding, employing an attendant, etc.)                              |
| borrow money              | socioeconomics | Did your household have to borrow money to pay for this hospitalization?                                                                    |
| sell possessions          | socioeconomics | Did your household have to sell any land or possessions to pay for this hospitalization?                                                    |
| lost wages                | socioeconomics | Did your household lose wages as result of this hospitalization?                                                                            |
| lost job                  | socioeconomics | Did you or anyone in your household permanently lose a job as a result of this hospitalization?                                             |

|               |                |                                                                               |
|---------------|----------------|-------------------------------------------------------------------------------|
| annual income | socioeconomics | Annual family income BEFORE this hospitalization                              |
| subsidy       | socioeconomics | Did your child receive any government subsidy to help pay for this operation? |
| subsidy_value | socioeconomics | What was the approximate monetary value of this subsidy?                      |
| travel time   | socioeconomics | How long did it take you to reach the hospital when you started travelling?   |

**Supplemental Table 2** Interrupted Time Series Analysis Output

|                      | Total                       |               |                   | Elective                    |               |                   | Emergency                   |               |                   |
|----------------------|-----------------------------|---------------|-------------------|-----------------------------|---------------|-------------------|-----------------------------|---------------|-------------------|
|                      | <i>Volume (cases/month)</i> | <i>95% CI</i> | <i>p-value</i>    | <i>Volume (cases/month)</i> | <i>95% CI</i> | <i>p-value</i>    | <i>Volume (cases/month)</i> | <i>95% CI</i> | <i>p-value</i>    |
| <b>All Sites</b>     |                             |               |                   |                             |               |                   |                             |               |                   |
| <i>Baseline</i>      | 55.3                        | -7.9, 118.5   | 0.083             | 40.7                        | -1.5, 82.8    | 0.058             | 15.8                        | -11.9, 43.5   | 0.251             |
| <i>Pre-COVID Δ</i>   | 20.8                        | 13.5, 28.2    | <b>&lt;0.001*</b> | 9.9                         | 5.6, 14.2     | <b>&lt;0.001*</b> | 10.9                        | 7.6, 14.3     | <b>&lt;0.001*</b> |
| <i>Immediate Δ</i>   | -109.8                      | -195.5, -24.2 | <b>0.014*</b>     | -73.3                       | -116.6, -30.0 | <b>0.002*</b>     | -36.0                       | -70.9, -1.2   | <b>0.043*</b>     |
| <i>Post-COVID Δ</i>  | 1.0                         | -6.3, 8.2     | 0.784             | 3.2                         | -1.5, 7.9     | 0.175             | -2.3                        | -6.2, 1.5     | 0.220             |
| <i>Pre- vs Post-</i> | -19.9                       | -30.2, -9.6   | <b>0.001*</b>     | -6.7                        | -13.1, -0.4   | <b>0.038*</b>     | -13.3                       | -19.1, -7.4   | <b>&lt;0.001*</b> |
| <b>Burkina Faso</b>  |                             |               |                   |                             |               |                   |                             |               |                   |
| <i>Baseline</i>      | 37.7                        | -7.1, 82.5    | 0.095             | 28.3                        | 15.4, 41.2    | <b>&lt;0.001*</b> | 25.2                        | -5.6, 56.0    | 0.104             |
| <i>Pre-COVID Δ</i>   | 12.1                        | 6.2, 18.0     | <b>&lt;0.001*</b> | -0.2                        | -2.5, 2.2     | 0.878             | 10.2                        | 5.9, 14.6     | <b>&lt;0.001*</b> |
| <i>Immediate Δ</i>   | -49.5                       | -100.6, 1.6   | 0.057             | -5.0                        | -30.9, 20.9   | 0.692             | -36.1                       | -71.4, -0.8   | <b>0.045*</b>     |
| <i>Post-COVID Δ</i>  | -0.1                        | -5.5, 5.3     | 0.977             | 1.6                         | -0.2, 3.4     | 0.078             | -1.7                        | -5.6, 2.3     | 0.386             |
| <i>Pre- vs Post-</i> | -12.1                       | -20.9, -3.4   | <b>0.009*</b>     | 1.8                         | -1.0, 4.6     | 0.205             | -11.9                       | -18.6, -5.3   | <b>&lt;0.001*</b> |
| <b>Ecuador</b>       |                             |               |                   |                             |               |                   |                             |               |                   |
| <i>Baseline</i>      | 20.9                        | 13.8, 27.9    | <b>&lt;0.001*</b> | 14.3                        | 10.6, 18.1    | <b>&lt;0.001*</b> | 6.6                         | 4.5, 8.7      | <b>&lt;0.001*</b> |
| <i>Pre-COVID Δ</i>   | -0.04                       | -0.87, 0.80   | 0.927             | 0.03                        | -0.63, 0.68   | 0.929             | -0.02                       | -0.30, 0.26   | 0.872             |
| <i>Immediate Δ</i>   | -5.8                        | -14.0, 2.3    | 0.154             | -4.3                        | -11.3, 2.6    | 0.211             | -1.9                        | -6.3, 2.5     | 0.391             |
| <i>Post-COVID Δ</i>  | 0.26                        | -0.28, 0.81   | 0.330             | 0.21                        | -0.30, 0.69   | 0.385             | 0.03                        | -0.37, 0.42   | 0.892             |
| <i>Pre- vs Post-</i> | 0.30                        | -0.70, 1.30   | 0.541             | 0.18                        | -0.73, 1.09   | 0.69              | 0.05                        | -0.43, 0.53   | 0.838             |
| <b>Nigeria</b>       |                             |               |                   |                             |               |                   |                             |               |                   |
| <i>Baseline</i>      | 13.4                        | 7.9, 18.9     | <b>&lt;0.001*</b> | 6.8                         | 3.5, 10.1     | <b>&lt;0.001*</b> | 7.6                         | 4.8, 10.3     | <b>&lt;0.001*</b> |
| <i>Pre-COVID Δ</i>   | 1.6                         | 0.7, 2.5      | <b>0.002*</b>     | 1.6                         | 0.9, 2.3      | <b>&lt;0.001*</b> | -0.04                       | -0.4, 0.3     | 0.777             |
| <i>Immediate Δ</i>   | -11.8                       | -29.3, 5.8    | 0.179             | -14.1                       | -28.6, 0.4    | 0.057             | 2.8                         | -2.2, 7.7     | 0.258             |
| <i>Post-COVID Δ</i>  | 1.3                         | -0.6, 3.1     | 0.178             | 1.6                         | -0.1, 3.2     | 0.070             | -0.4                        | -0.7, -0.02   | <b>0.040*</b>     |
| <i>Pre- vs Post-</i> | -0.3                        | -2.4, 1.8     | 0.739             | -0.1                        | -1.9, 1.8     | 0.951             | -0.3                        | -0.8, 0.2     | 0.18              |
| <b>Zambia</b>        |                             |               |                   |                             |               |                   |                             |               |                   |
| <i>Baseline</i>      | 63.1                        | 8.6, 117.5    | <b>0.025*</b>     | 58.4                        | 6.5, 110.2    | <b>0.029*</b>     | 6.5                         | 2.4, 10.6     | <b>0.004*</b>     |
| <i>Pre-COVID Δ</i>   | 1.9                         | -5.8, 9.6     | 0.61              | 2.0                         | -5.4, 9.3     | 0.58              | -0.4                        | -1.0, 0.3     | 0.233             |
| <i>Immediate Δ</i>   | -18.5                       | -52.9, 15.8   | 0.275             | -21.4                       | -55.1, 12.4   | 0.202             | 4.3                         | -1.9, 10.6    | 0.163             |
| <i>Post-COVID Δ</i>  | -0.5                        | -3.1, 2.1     | 0.705             | -0.2                        | -2.8, 2.4     | 0.887             | -0.3                        | -1.0, 0.4     | 0.340             |
| <i>Pre- vs Post-</i> | -2.4                        | -10.5, 5.7    | 0.546             | -2.2                        | -9.9, 5.6     | 0.569             | 0.1                         | -0.9, 1.0     | 0.916             |
